*Dagvadorj and Solomon 2021*

1 **Simple and efficient heterologous expression of necrosis-inducing effectors using the**  
2 **model plant *Nicotiana benthamiana***

3 Bayantes Dagvadorj<sup>1</sup>, Peter S. Solomon<sup>1\*</sup>

4

5 <sup>1</sup>Research School of Biology, The Australian National University, Canberra, ACT 2601,  
6 Australia

7 \*Corresponding author: Peter S. Solomon

8 Email: peter.solomon@anu.edu.au

9 Address: Research School of Biology, The Australian National University, Canberra, ACT  
10 2601, Australia

11

12 **Keywords**

13 *Nicotiana benthamiana*, necrotrophic effectors, heterologous expression system,

14 *Parastagonospora nodorum*, wheat

15

16 **Running title**

17 Necrotic effectors produced by plant expression system

18

19 **Conflicts of interest**

20 The authors declare that they have no conflicts of interest.

21

22

23

24

25

26 **Abstract**

27 Plant fungal pathogens cause devastating diseases on cereal plants and threaten global food  
28 security. During infection, these pathogens secrete proteinaceous effectors that promote  
29 disease. Some of these effectors from necrotrophic plant pathogens induce a cell death  
30 response (necrosis), which facilitates pathogen growth *in planta*. Characterisation of these  
31 effectors typically requires heterologous expression and microbial expression systems such as  
32 bacteria and yeast are the predominantly used. However, microbial expression systems often  
33 require optimization for any given effector and are, in general, not suitable for effectors  
34 involving cysteine bridges and posttranslational modifications for activity. Here, we describe  
35 a simple and efficient method for expressing such effectors in the model plant *Nicotiana*  
36 *benthamiana*. Briefly, an effector protein is transiently expressed and secreted into the  
37 apoplast of *N. benthamiana* by *Agrobacterium*-mediated infiltration. Two-to-three days  
38 subsequent to agroinfiltration, the apoplast from the infiltrated leaves is extracted and can be  
39 directly used for phenotyping on host plants. The efficacy of this approach was demonstrated  
40 by expressing the ToxA, Tox3 and Tox1 necrosis-inducing effectors from *Parastagonospora*  
41 *nodorum*. All three effectors produced in *N. benthamiana* were capable of inducing necrosis  
42 in wheat lines, and two of three showed visible bands on Coomassie-stained gel. These data  
43 suggest that *N. benthamiana*-agroinfiltration system is a feasible tool to obtain fungal  
44 effectors, especially those that require disulfide bonds and posttranslational modifications.  
45 Furthermore, due to the low number of proteins typically observed in the apoplast (compared  
46 to intracellular), this simple and high-throughput approach circumvents the requirement to  
47 lyse cells and further purify the target proteins that is required in other heterologous systems.  
48 Because of its simplicity and potential for high-throughput, this method is highly amenable to  
49 the phenotyping of candidate protein effectors on host plants.

50

51 **Abbreviations**

52 AWF: Apoplast washing fluid

53 NEs: Necrotrophic effectors

54 NtPR1sp: *Nicotiana tabacum* pathogenesis-related protein 1 signal peptide

55 SCR: small cysteine-rich

56

## 57 **Introduction**

58 Cereal production is susceptible to severe yield losses due to plant pathogens. During  
59 infection, plant pathogens secrete a repertoire of proteins called effectors into the apoplast or  
60 cytoplasm of the host cells to modulate plant processes and promote infection (Dodds and  
61 Rathjen 2010). Whilst these effectors underpin key disease mechanisms, many can be  
62 recognised by the plant, and the outcome of this interaction is broadly dependent on the  
63 lifecycle of the specific pathogen. In biotrophic pathogens, effectors can be recognised by  
64 specific host receptors, triggering programmed cell death at the site of infection that results in  
65 plant resistance against these pathogens (Dodds and Rathjen 2010). In contrast, recent  
66 findings suggest that some necrotrophic pathogens, such as *Parastagonospora nodorum*,  
67 hijack these host resistance pathways for their own benefit (McDonald and Solomon 2018).  
68 Necrotrophic effectors (NEs) induce cell death only in the presence of host dominant  
69 susceptibility genes that strikingly resemble typical defence receptors (Lorang et al. 2012;  
70 Faris et al. 2010; Shi et al. 2016). Recognition, and the subsequent host cell death, is favoured  
71 by necrotrophic pathogens leading to plant susceptibility instead of resistance (Faris and  
72 Friesen 2020).

73 Despite recognising the important role effectors have in mediating disease, there are several  
74 challenges in understanding their function. These challenges are exemplified in studying  
75 effectors secreted by pathogens of non-model plants that lack genetic amenability. For  
76 example, most monocotyledon plants, such as economically important wheat and rice, are not  
77 compatible with the agroinfiltration method that allows transient expression of proteins in  
78 plants. Although the stable transformation has recently become possible in some of these  
79 plant species, including wheat, the approach is slow and cumbersome. To counter this,  
80 researchers have often turned to expressing their effectors of interest in model plant systems,  
81 such as *N. benthamiana*, as many effectors and their host cognate receptors are active in such  
82 systems (Vleeshouwers et al. 2008; Van Der Hoorn et al. 2000; Ma et al. 2012; Chen et al.  
83 2017). In these cases, the transient expression of the effector with the corresponding host  
84 receptor is often sufficient to produce a cell-death phenotype that allows functional  
85 characterisation of their interaction (e.g. determining required amino acids for recognition  
86 etc). However, this approach does not appear to work for NEs (particularly from  
87 monocotyledon cereal pathogens) and their dominant susceptibility genes and co-expression  
88 in model systems such as *N. benthamiana* does not lead to a visible cell death. Therefore, this  
89 lack of a visible phenotype precludes this co-expression approach from being used to study

*Dagvadorj and Solomon 2021*

90 these interactions (as it can be with many biotrophic effectors). Consequently, as an  
91 alternative approach, NEs are often expressed using heterologous systems for characterisation  
92 and subsequent phenotyping on host plants (Zhang et al. 2017; Outram et al. 2020; Sung et al.  
93 2021; Liu et al. 2012, 2009). Almost exclusively, NEs have been expressed by using  
94 microbial expression systems such as *Escherichia coli* and *Pichia Pastoris*.

95 Many known and predicted effectors are small cysteine-rich (SCR) proteins (Saunders et al.  
96 2012; Duplessis et al. 2011; Sperschneider et al. 2015; Stergiopoulos and De Wit 2009). It  
97 has been demonstrated that the cysteines in many of these effectors form disulfide bonds  
98 providing stability for these proteins in the apoplast (Saunders et al. 2012). For instance, the  
99 Tox3 and Tox1 effectors from *P. nodorum* contains six and sixteen cysteines respectively,  
100 and at least one disulfide bond is required for their necrosis-inducing activity (Liu et al. 2012,  
101 2009; Outram et al. 2020). Similarly, *Cladosporium fulvum* effector Avr2 has four disulfide  
102 bonds that are essential for its function of inhibiting cysteine protease Rcr3 in tomato plants  
103 (Rooney et al. 2005). Moreover, some effectors such as ToxA and Tox3 appear to contain  
104 pro-domains subsequent to their secretion signals which are thought to be important for  
105 folding and are processed prior to secretion from the fungi (Outram et al. 2020; Tuori et al.  
106 2000; Liu et al. 2009). Recently, Outram et al., (2020) reported that the pro-domain of Tox3  
107 was cleaved by KEX2 protease that lead to a processed protein with demonstrably higher  
108 activity indicating that some necrotrophic effectors require posttranslational modification and  
109 processing to become fully active. However, because of these requirements, such proteins are  
110 difficult to express using a bacterial system due to the absence of eukaryotic cell organelles  
111 necessary for disulfide bond formation and posttranslational modifications. Lobstein *et al.*  
112 (2012) developed a new bacterial strain, *E. coli* SHuffle, which favors cytoplasmic disulfide  
113 bond formations. This new strain allowed researchers to express effectors harbouring  
114 disulfide bonds in soluble forms (Zhang et al. 2017; Outram et al. 2020). For example, one  
115 study demonstrated that the *E. coli* SHuffle system was successful in producing four out of  
116 five SCRs that were trialled (Zhang et al. 2017). Subsequent functional studies on three of the  
117 effectors and showed they were biologically active (Zhang et al. 2017). However, yields were  
118 often low limiting subsequent functional characterisation. Another approach to express SCR  
119 effectors has been using secretion pathways in eukaryotic cells such as yeast. Using this  
120 method, the SCR effectors SnTox1 and SnTox3 were successfully expressed at low levels in  
121 secreted forms and showed activity in wheat lines harboring corresponding susceptibility  
122 genes (Liu et al. 2009, 2012).

## Dagvadorj and Solomon 2021

123 However, in microbial expression systems, various physical parameters need to be adjusted to  
124 achieve optimal expression conditions that can vary among different strains and target  
125 proteins. For example, in the *E. coli* SHuffle system, the effect of temperature and inducer  
126 concentration were specific to a given protein when tested on seven different proteins  
127 requiring disulfide bonds (Lobstein et al. 2012). Likewise, in the *P. pastoris* system,  
128 methanol is the primary carbon source, and its concentration must be closely monitored  
129 depending on the rate of utilization by the cells; less methanol decreases productivity,  
130 whereas too much is toxic to cells (Karbalaee et al. 2020). In addition to these examples,  
131 many other parameters in both *E. coli* and *P. pastoris* most likely need optimization for every  
132 new target protein (Lobstein et al. 2012; Karbalaee et al. 2020), which can be time-consuming  
133 and laborious. This can be a significant bottleneck for laboratories who do not have  
134 substantial protein expertise or are not experienced with microbial expression systems.

135 Here, we describe a simple and high-throughput method for heterologous expression of  
136 cysteine-rich effectors using the secretion pathway of model plant *N. benthamiana*. We  
137 demonstrate the efficacy of this method by expressing three unrelated necrosis-inducing  
138 effectors (that differ in their cysteine content) from *P. nodorum* and subsequent investigation  
139 of their activity on the host plant. Our data show that this plant expression approach can be  
140 used for rapid on-host functional screening of candidate necrotrophic effectors, especially  
141 those that require disulfide bonds and posttranslational modifications.

142

## 143 **Materials / Methods**

### 144 **Plant material and growth conditions**

145 *Triticum aestivum* cultivars Grandin, Corack, Calingari, and BG261 were grown in a  
146 controlled growth chamber with 250  $\mu$ E light intensity, 85% relative humidity, and  
147 photoperiod of 16-h light at 20°C/8-h dark at 12°C. *Nicotiana benthamiana* plants were  
148 grown at 22°C with 16-h light/8-h dark cycle in a growth room.

149

### 150 **Cloning the effector proteins**

151 The signal peptide sequences (SPs) of the effector proteins were predicted using SignalP-5.0  
152 (Almagro Armenteros et al. 2019). The predicted SPs were replaced with *Nicotiana tabacum*  
153 PR-1 signal peptide (NtPR1sp) to promote efficient secretion of the effectors in *N.*  
154 *benthamiana*. These effector constructs were synthesized as gBlocks (IDT, Integrated DNA

*Dagvadorj and Solomon 2021*

155 Technology), which were cloned into pENTR/D-TOPO gateway entry vector. The entry  
156 vectors were sequence confirmed and recombined into the pB7FWG2 gateway destination  
157 vector carrying C-terminus tag (GFP) fusion. To prevent the tag fusion to the effectors, we  
158 kept the original stop codons in the recombinant effector constructs, which allow the effectors  
159 to be expressed without the protein tag. The sequence confirmed destination vectors were  
160 transformed by electroporation into *Agrobacterium tumefaciens* (GV3101, pMP90) for agro-  
161 infiltration assays.

162

163 **Agro-infiltration assays**

164 Agro-infiltration assays were carried out as described previously (Dagvadorj et al. 2017).  
165 Briefly, *A. tumefaciens* carrying the effector constructs were streaked on LB-agar plates with  
166 antibiotics (Spectinomycin 100 µg/ml, Gentamycin 20 µg/ml and Rifampicin 100 µg/ml) and  
167 grown for 2-3 days at 28°C. The bacterial cells on the plate were collected by scraping with  
168 1 ml pipette tip, transferred to new 1.5 ml microcentrifuge tube and resuspended in 1 ml  
169 distilled water. The cells were centrifuged at 4000 rpm for 5 min at room temperature. The  
170 cell pellet was washed in 1 ml fresh Agro-induction buffer (AI; 10 mM MES pH 5.6, 10 mM  
171 MgCl<sub>2</sub>) and centrifuged again under the same conditions. Finally, the pellet was suspended in  
172 1 ml AI buffer, and the cell suspension was diluted with AI buffer until the optical density  
173 (OD) of the cell suspension was adjusted to 0.2 for infiltration experiments. To enhance  
174 transient expression level, the cell suspensions were co-infiltrated with *A. tumefaciens*  
175 containing p19 RNA silencing suppressor construct (OD of 0.1). *N. benthamiana* 4- to 6-  
176 week of age were agro-infiltrated, and the leaves were harvested at 2 days post-  
177 agroinfiltration for apoplast wash fluid extraction.

178

179 **Apoplast washing fluid extraction**

180 Apoplast washing fluid (AWF) was extracted as previously described with minor  
181 modifications (O'Leary et al. 2014). *N. benthamiana* leaves expressing the effector constructs  
182 were detached and submerged in a beaker with Milli-Q water. The beaker was placed into a  
183 desiccator and a vacuum of -80 kPa applied for 1 min. By gradually releasing the vacuum, the  
184 air within the apoplastic space was infiltrated with the water, and the infiltrated area appeared  
185 dark translucent by naked eye. This process was repeated until the whole leaf was infiltrated.  
186 Then, the leaves were wiped gently with clean tissue to remove the surface water and then, 3-  
187 4 leaves sandwiched together in parafilm sheets, rolled and placed into a 20 ml syringe, in a

*Dagvadorj and Solomon 2021*

188 50 mL Falcon tube. To isolate AWF, the Falcon tube was centrifuged at 500 g for 10 min at  
189 4°C. The collected AWF (400-500 µL/per leaf) was transferred to microcentrifuge tubes and  
190 centrifuged again at 17,000 g for 5 min at 4°C to remove cell debris and other insoluble  
191 materials. The supernatant was transferred to a fresh tube and used immediately or stored at -  
192 80 °C.

193

194 **MS for ToxA and Tox3 protein identification**

195 For peptide mapping of the ToxA and Tox3 proteins, AWF samples were separated on a 15%  
196 SDS-PAGE gel and stained with Coomassie blue. The proteins of interest were excised and  
197 subjected to in-gel trypsin digestion as previously described (Sung et al. 2021). Subsequent  
198 mass spectrometry data were analysed using Max-Quant software, v.1.6.0.8 (Tyanova et al.  
199 2016). Tryptic peptides were mapped to the sequence of ToxA and Tox3 by using the trypsin  
200 enzyme digestion in semi-specific mode.

201

202 **AWF infiltration into wheat leaves**

203 AWF samples were infiltrated using a needleless syringe into the second leaf of 2-week old  
204 wheat cultivars until the infiltration zone reached 3-5 cm. The wheat leaves were checked for  
205 the induction of necrosis from one day post-infiltration (dpi) and recorded at 3 dpi.

206

207 **Results**

208 To trial the expression of SCR proteins in *N. benthamiana*, the ToxA, Tox3 and Tox1  
209 effector proteins from *P. nodorum* were chosen (Table 1). ToxA, Tox3 and Tox1 induce  
210 necrosis on wheat lines harbouring the susceptibility genes *Tsn1*, *Snn3* and *Snn1*,  
211 respectively. The mature forms of ToxA, Tox3 and Tox1 each contain two, six and sixteen  
212 cysteine residues respectively, and their ability to induce necrosis is reliant on disulphide  
213 bond formation (Liu et al. 2012; Zhang et al. 2017; Sarma et al. 2005). In addition, ToxA and  
214 Tox3 require posttranslational modifications such as processing of pro-domain to become  
215 fully active (Outram et al. 2020; Tuori et al. 2000).

216 To secrete the effector proteins to the apoplast of *N. benthamiana*, all three effectors were  
217 cloned with the *Nicotiana tabacum* PR-1 signal peptide (NtPR1sp; Ohshima et al. 1987) as  
218 shown in Figure 1a. This modification promotes the proteins to follow correct secretion  
219 pathway in *N. benthamiana* (Ma et al. 2015; Breen et al. 2016; Grosse-Holz et al. 2018). The



*Dagvadorj and Solomon 2021*

220 effectors were expressed under control of CaMV 35S promoter. After two days post agro-  
221 infiltration, we isolated the apoplast washing fluid (AWF) from *N. benthamiana* leaves  
222 expressing the effectors. The proteins within extracted AWFs were resolved by SDS-PAGE  
223 for analysis (Figure 1b). Although no observable band was detected for Tox1, the AWF  
224 containing ToxA and Tox3 showed bands within the size ranges of 12-14 kDa and 17-18  
225 kDa, respectively. These sizes are similar to the respective sizes of mature ToxA and Tox3  
226 identified from *P. nodorum* culture filtrates, respectively. To confirm the identity of the  
227 observed proteins, the bands were excised from the gel and subjected to tryptic digest MS. As  
228 expected, 'Band1' and 'Band2' in Figure 1b were positively identified as ToxA and Tox3,  
229 respectively (Figure 1c). Our analysis of the samples revealed that pro-domain of ToxA and  
230 Tox3 could not be detected, whereas C-terminal region of ToxA and Tox3 appeared to be  
231 intact (Figure 1c). Together, these results suggest that mature forms of ToxA and Tox3 were  
232 present in the apoplast of *N. benthamiana*.

233 To test biological activity of the effectors, the AWFs containing each of ToxA, Tox3, and  
234 Tox1 were infiltrated into wheat cultivars carrying *Tsn1*, *Snn3* and *Snn1* susceptibility genes  
235 (Grandin, Corack, and Calingari), respectively (Figure 2). Our results showed that the ToxA,  
236 Tox3 and Tox1 AWFs were able to induce necrosis in a genotype specific manner. Although  
237 we could not detect Tox1 band in protein gel analysis, we did observe chlorosis and necrosis  
238 development in the *Snn1* wheat cultivar (Calingari) infiltrated with AWF with Tox1 (Figure  
239 2). A slight chlorotic response was also evident on the *snn1* cultivar Corack upon infiltration  
240 of the Tox1 AWF although a minor non-specific reaction for this effector has been previously  
241 noted when purified from *E. coli* (Zhang et al. 2017). Collectively, these results suggest that  
242 *N. benthamiana* expressed and secreted ToxA, Tox3 and Tox1 are biologically active.

243

## 244 **Discussion**

245 In this study, we showed that fungal SCR effectors can be expressed and processed the using  
246 *N. benthamiana*-agroinfiltration system. Three unrelated SCR effectors, differing in their  
247 cysteine content, were successfully produced as active forms. In comparison to other methods  
248 currently used in the field, the approach we presented here is simple and efficient, which may  
249 facilitate the identification of putative NEs by screening for cell-death phenotype on host  
250 plants. This method may also be an alternative for researchers who struggle with expressing  
251 SCR effectors using microbial expression systems. In line with this, a recent study showed



*Dagvadorj and Solomon 2021*

252 that using agroinfiltration, the apoplast targeted NLP2 (necrosis and ethylene-inducing  
253 peptide-like protein) was successfully expressed and induced necrosis in legume plants  
254 including field pea, faba bean and lentil; but not in chickpea (Debler et al. 2021). This further  
255 corroborates that plants can serve as a heterologous expression system to produce  
256 biologically active fungal effectors in secreted form.

257 This approach has several advantages compared with existing methods used to express  
258 necrotrophic effectors. Firstly, the plant signal peptide allows proteins to be trafficked  
259 through secretion pathways such as the endoplasmic reticulum and Golgi facilitating the  
260 formation of disulfide bonds and other posttranslational modifications. This facilitates the  
261 correct folding of SCR proteins are therefore more likely to be soluble compared to  
262 cytoplasmic-expressed proteins. Secondly, the apoplast can be separated mechanically from  
263 the plant cells, which enables the resolution of the mature proteins in the apoplast from the  
264 unprocessed forms inside the cell. This is not the case in cytosolically expressed proteins if  
265 crude extract used for the functional studies. Thirdly, the apoplast of the plant cell contains  
266 significantly less proteins and molecules than in the cytosol. Therefore, isolated apoplast  
267 wash fluid with target protein has much less background or contaminating proteins compared  
268 to proteins expressed in the cytosol for functional studies. Furthermore, the reduced protein  
269 content in the apoplast simplifies subsequent purification of the target protein if required.  
270 Although yeast eukaryotic systems can provide these advantages, various parameters  
271 influence the optimal expression, which can differ for any given protein. Thus, the  
272 optimization process is more challenging than compared with the *N. benthamiana*-  
273 agroinfiltration system.

274 However, the limitations of this method must be acknowledged. This approach may not be  
275 suitable for certain effectors, specifically those that trigger rapid cell-death in *N.*  
276 *benthamiana*. Several studies reported that effectors caused cell-death in *N. benthamiana*  
277 when expressed with their respective signal peptide (Kettles et al. 2017; Dagvadorj et al.  
278 2017; Fang et al. 2016; Ma et al. 2015). For instance, eleven out of 119 putative effectors  
279 from *Ustilaginoidea virens* induced cell-death in *N. benthamiana*; however, the cause of the  
280 cell-death was unknown. In other studies, a group of effectors from *Zymoseptoria tritici*  
281 (Kettles et al. 2017), XEG1 effector from *Phytophthora sojae* (Ma et al. 2015), and PstSCR1  
282 effector from *Puccinia striiformis* (Dagvadorj et al. 2017) triggered cell-death in *N.*  
283 *benthamiana*, which appear to be dependent on immune receptors such as  
284 NbSER3/NbBAK1. These results suggest that some effectors can activate basal immunity

*Dagvadorj and Solomon 2021*

285 resulting the plant cell-death. For these types of effectors, non-plant systems may be more  
286 suitable.

287 Our study shows that *N. benthamiana*-agroinfiltration system can serve as an expression  
288 system for fungal cysteine-rich effectors. The expression of three unrelated effectors using  
289 this system displays production of high and biologically active effectors. This method can be  
290 upscaled and combined with a typical protein purification procedure to purify the protein of  
291 interest with little efforts. More importantly, this system applicable for expressing almost any  
292 protein (with some exceptions) resides in an extracellular space of the cell.

293

294 **Acknowledgements**

295 This research was supported by the Australian Research Council (ARC) Discovery Project  
296 DP180102355. The authors thank Yi-Chang Sun for his technical assistance with the MS  
297 experiment.  
298

299 **References**

- 300 Almagro Armenteros, J. J., Tsirigos, K. D., Sønderby, C. K., Petersen, T. N., Winther, O.,  
301 Brunak, S., von Heijne, G., and Nielsen, H. 2019. SignalP 5.0 improves signal peptide  
302 predictions using deep neural networks. *Nat. Biotechnol.* 37:420–423
- 303 Breen, S., Williams, S. J., Winterberg, B., Kobe, B., and Solomon, P. S. 2016. Wheat PR-1  
304 proteins are targeted by necrotrophic pathogen effector proteins. *Plant J.* 88:13–25
- 305 Chen, J., Upadhyaya, N. M., Ortiz, D., Sperschneider, J., Li, F., Bouton, C., Breen, S., Dong,  
306 C., Xu, B., Zhang, X., Mago, R., Newell, K., Xia, X., Bernoux, M., Taylor, J. M.,  
307 Steffenson, B., Jin, Y., Zhang, P., Kanyuka, K., Figueroa, M., Ellis, J. G., Park, R. F.,  
308 and Dodds, P. N. 2017. Loss of *AvrSr50* by somatic exchange in stem rust leads to  
309 virulence for *Sr50* resistance in wheat. *Science.* 358:1607–1610
- 310 Dagvadorj, B., Ozketen, A. C., Andac, A., Duggan, C., Bozkurt, T. O., and Akkaya, M. S.  
311 2017. A *Puccinia striiformis* f. sp. *tritici* secreted protein activates plant immunity at the  
312 cell surface. *Sci. Rep.* 7:1141

*Dagvadorj and Solomon 2021*

- 313 Debler, J. W., Henares, B. M., and Lee, R. C. 2021. Agroinfiltration for transient gene  
314 expression and characterisation of fungal pathogen effectors in cool □ season grain  
315 legume hosts. *Plant Cell Rep.*
- 316 Dodds, P. N., and Rathjen, J. P. 2010. Plant immunity: towards an integrated view of plant–  
317 pathogen interactions. *Nat. Rev. Genet.* 11:539–548
- 318 Duplessis, S., Cuomo, C. A., Lin, Y. C., Aerts, A., Tisserant, E., Veneault-Fourrey, C., Joly,  
319 D. L., Hacquard, S., Amselem, J., Cantarel, B. L., Chiu, R., Coutinho, P. M., Feau, N.,  
320 Field, M., Frey, P., Gelhaye, E., Goldberg, J., Grabherr, M. G., Kodira, C. D., Kohler,  
321 A., Kues, U., Lindquist, E. A., Lucas, S. M., Mago, R., Mauceli, E., Morin, E., Murat,  
322 C., Pangilinan, J. L., Park, R., Pearson, M., Quesneville, H., Rouhier, N., Sakthikumar,  
323 S., Salamov, A. A., Schmutz, J., Selles, B., Shapiro, H., Tanguay, P., Tuskan, G. A.,  
324 Henrissat, B., Van de Peer, Y., Rouze, P., Ellis, J. G., Dodds, P. N., Schein, J. E., Zhong,  
325 S., Hamelin, R. C., Grigoriev, I. V., Szabo, L. J., and Martin, F. 2011. From the Cover:  
326 Obligate biotrophy features unraveled by the genomic analysis of rust fungi. *Proc Natl*  
327 *Acad Sci U S A.* 108:9166–9171
- 328 Fang, A., Han, Y., Zhang, N., Zhang, M., Liu, L., Li, S., Lu, F., and Sun, W. 2016.  
329 Identification and Characterization of Plant Cell Death-Inducing Secreted Proteins From  
330 *Ustilaginoidea virens*. *Mol. Plant. Microbe. Interact.* 29:405–416
- 331 Faris, J. D., and Friesen, T. L. 2020. Plant genes hijacked by necrotrophic fungal pathogens.  
332 *Curr. Opin. Plant Biol.* 56:74–80
- 333 Faris, J. D., Zhang, Z., Lu, H., Lu, S., Reddy, L., Cloutier, S., Fellers, J. P., Meinhardt, S. W.,  
334 Rasmussen, J. B., Xu, S. S., Oliver, R. P., Simons, K. J., and Friesen, T. L. 2010. A  
335 unique wheat disease resistance-like gene governs effector-triggered susceptibility to  
336 necrotrophic pathogens. *Proc. Natl. Acad. Sci.* 107:13544–13549
- 337 Friesen, T. L., Stukenbrock, E. H., Liu, Z., Meinhardt, S., Ling, H., Faris, J. D., Rasmussen,

*Dagvadorj and Solomon 2021*

- 338 J. B., Solomon, P. S., McDonald, B. A., and Oliver, R. P. 2006. Emergence of a new  
339 disease as a result of interspecific virulence gene transfer. *Nat. Genet.* 38:953–956
- 340 Grosse-Holz, F., Madeira, L., Zahid, M. A., Songer, M., Kourelis, J., Fesenko, M., Ninck, S.,  
341 Kaschani, F., Kaiser, M., and van der Hoorn, R. A. L. 2018. Three unrelated protease  
342 inhibitors enhance accumulation of pharmaceutical recombinant proteins in *Nicotiana*  
343 *benthamiana*. *Plant Biotechnol. J.* 16:1797–1810
- 344 Van Der Hoorn, R. A. L., Laurent, F., Roth, R., and De Wit, P. J. G. M. 2000.  
345 Agroinfiltration is a versatile tool that facilitates comparative analyses of *Avr9/Cf-9*-  
346 induced and *Avr4/Cf-4*-induced necrosis. *Mol. Plant-Microbe Interact.* 13:439–446
- 347 Karbalaeei, M., Rezaee, S. A., and Farsiani, H. 2020. *Pichia pastoris*: A highly successful  
348 expression system for optimal synthesis of heterologous proteins. *J. Cell. Physiol.*  
349 235:5867–5881
- 350 Kettles, G. J., Bayon, C., Canning, G., Rudd, J. J., and Kanyuka, K. 2017. Apoplastic  
351 recognition of multiple candidate effectors from the wheat pathogen *Zymoseptoria tritici*  
352 in the nonhost plant *Nicotiana benthamiana*. *New Phytol.* 213:338–350
- 353 Liu, Z., Faris, J. D., Oliver, R. P., Tan, K. C., Solomon, P. S., McDonald, M. C., McDonald,  
354 B. A., Nunez, A., Lu, S., Rasmussen, J. B., and Friesen, T. L. 2009. SnTox3 acts in  
355 effector triggered susceptibility to induce disease on wheat carrying the *Snn3* gene.  
356 *PLoS Pathog.* 5:e1000581
- 357 Liu, Z., Zhang, Z., Faris, J. D., Oliver, R. P., Syme, R., and McDonald, M. C. 2012. The  
358 cysteine rich necrotrophic effector SnTox1 produced by *Stagonospora nodorum* triggers  
359 susceptibility of wheat lines harboring *Snn1*. *PLoS Pathog.* 8:e1002467
- 360 Lobstein, J., Emrich, C. A., Jeans, C., Faulkner, M., Riggs, P., and Berkmen, M. 2012.  
361 Erratum to: SHuffle, a novel *Escherichia coli* protein expression strain capable of  
362 correctly folding disulfide bonded proteins in its cytoplasm. *Microb. Cell Fact.* 11:1–16

*Dagvadorj and Solomon 2021*

- 363 Lorang, J., Kidarsa, T., Bradford, C. S., Gilbert, B., Curtis, M., Tzeng, S. C., Maier, C. S.,  
364 and Wolpert, T. J. 2012. Tricking the guard: Exploiting plant defense for disease  
365 susceptibility. *Science*. 338:659–662
- 366 Ma, L., Lukasik, E., Gawehns, F., and Takken, F. L. W. 2012. The use of Agroinfiltration for  
367 transient expression of plant resistance and fungal effector proteins in *Nicotiana*  
368 *benthamiana* leaves. *Methods Mol. Biol.* 835:61–74
- 369 Ma, Z., Song, T., Zhu, L., Ye, W., Wang, Y., Shao, Y., Dong, S., Zhang, Z., Dou, D., Zheng,  
370 X., Tyler, B. M., and Wang, Y. 2015. A *Phytophthora sojae* glycoside hydrolase 12  
371 protein is a major virulence factor during soybean infection and is recognized as a  
372 PAMP. *Plant Cell*. 27:2057–2072
- 373 McDonald, M. C., and Solomon, P. S. 2018. Just the surface: advances in the discovery and  
374 characterization of necrotrophic wheat effectors. *Curr. Opin. Microbiol.* 46:14–18
- 375 O’Leary, B. M., Rico, A., McCraw, S., Fones, H. N., and Preston, G. M. 2014. The  
376 infiltration-centrifugation technique for extraction of apoplastic fluid from plant leaves  
377 using *Phaseolus vulgaris* as an example. *J. Vis. Exp.* :e52113
- 378 Ohshima, M., Matsuoka, M., Yamamoto, N., Tanaka, Y., Kano-Murakami, Y., Ozeki, Y.,  
379 Kato, A., Harada, N., and Ohashi, Y. 1987. Nucleotide sequence of the PR-1 gene of  
380 *Nicotiana tabacum*. *FEBS Lett.* 225:243–246
- 381 Outram, M. A., Sung, Y.-C., Yu, D., Dagvadorj, B., Rima, S. A., Jones, D. A., Ericsson, D.  
382 J., Sperschneider, J., Solomon, P. S., Kobe, B., and Williams, S. J. 2020. The crystal  
383 structure of SnTox3 from the necrotrophic fungus *Parastagonospora nodorum* reveals a  
384 unique effector fold and insights into Kex2 protease processing of fungal effectors.  
385 bioRxiv. :2020.05.27.120113
- 386 Rooney, H. C., Van’t Klooster, J. W., van der Hoorn, R. A., Joosten, M. H., Jones, J. D., and  
387 de Wit, P. J. 2005. Cladosporium Avr2 inhibits tomato Rcr3 protease required for Cf-2-

*Dagvadorj and Solomon 2021*

- 388 dependent disease resistance. *Science*. 308:1783–1786
- 389 Sarma, G. N., Manning, V. A., Ciuffetti, L. M., and Karplus, P. A. 2005. Structure of Ptr  
390 ToxA: An RGD-Containing Host-Selective Toxin from *Pyrenophora tritici-repentis*.  
391 17:3190–3202
- 392 Saunders, D. G. O., Win, J., Cano, L. M., Szabo, L. J., Kamoun, S., and Raffaele, S. 2012.  
393 Using hierarchical clustering of secreted protein families to classify and rank candidate  
394 effectors of rust fungi. *PLoS One*. 7:e29847
- 395 Shi, G., Zhang, Z., Friesen, T. L., Raats, D., Fahima, T., Brueggeman, R. S., Lu, S., Trick, H.  
396 N., Liu, Z., Chao, W., Frenkel, Z., Xu, S. S., Rasmussen, J. B., and Faris, J. D. 2016.  
397 The hijacking of a receptor kinase-driven pathway by a wheat fungal pathogen leads to  
398 disease. *Sci. Adv.* 2:1–9
- 399 Sperschneider, J., Dodds, P. N., Gardiner, D. M., Manners, J. M., Singh, K. B., and Taylor, J.  
400 M. 2015. Advances and Challenges in Computational Prediction of Effectors from Plant  
401 Pathogenic Fungi. *PLoS Pathog.* 11:1–7
- 402 Stergiopoulos, I., and De Wit, P. J. G. M. 2009. Fungal effector proteins. *Annu. Rev.*  
403 *Phytopathol.* 47:233–263
- 404 Sung, Y., Outram, M. A., Breen, S., Wang, C., Dagvadorj, B., Winterberg, B., Kobe, B.,  
405 Williams, S. J., and Solomon, P. S. 2021. PR1-mediated defence via C-terminal  
406 peptide release is targeted by a fungal pathogen effector. *New Phytol.* 229:3467–3480
- 407 Tuori, R. P., Wolpert, T. J., and Ciuffetti, L. M. 2000. Heterologous expression of functional  
408 Ptr ToxA. *Mol. Plant-Microbe Interact.* 13:456–464
- 409 Tyanova, S., Temu, T., and Cox, J. 2016. The MaxQuant computational platform for mass  
410 spectrometry-based shotgun proteomics. *Nat. Protoc.* 11:2301–2319
- 411 Vleeshouwers, V. G. A. A., Rietman, H., Krenek, P., Champouret, N., Oh, S., Wang, M.,  
412 Bouwmeester, K., Vosman, B., Visser, R. G. F., Govers, F., Kamoun, S., and Vossen, E.

*Dagvadorj and Solomon 2021*

413 A. G. Van Der. 2008. Effector Genomics Accelerates Discovery and Functional  
414 Profiling of Potato Disease Resistance and *Phytophthora Infestans* Avirulence Genes.  
415 3:e2875

416 Zhang, X., Nguyen, N., Breen, S., Outram, M. A., Dodds, P. N., Kobe, B., Solomon, P. S.,  
417 and Williams, S. J. 2017. Production of small cysteine-rich effector proteins in  
418 *Escherichia coli* for structural and functional studies. Mol. Plant Pathol. 18:141–151

419

420



421 **Figure legends**

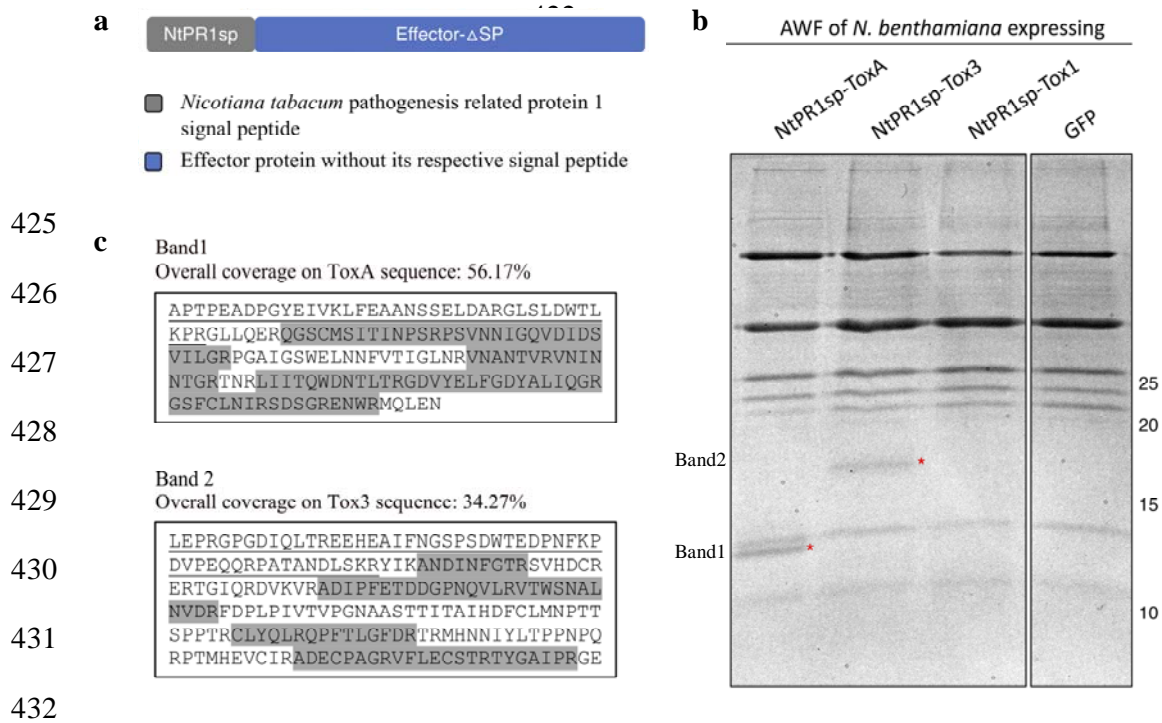

433 **Figure 1.** SCR effector proteins expression in *Nicotiana benthamiana*. (a) The schematic  
 434 view of effector constructs used in this study. (b) Coomassie brilliant blue stained sodium  
 435 dodecylsulfate-polyacrylamide gel electrophoresis (SDS-PAGE) analysis of apoplast washing  
 436 fluid (AWF) isolated from *N. benthamiana* expressing various constructs. Astericks indicate  
 437 the expected size of the matured ToxA and Tox3 proteins. AWF from *N. benthamiana*  
 438 expressing GFP was used for background control. (c) Tryptic in-gel digest of ToxA and Tox3  
 439 from AWF of *N. benthamiana*. Tryptic peptides recovered after in-gel digest of  
 440 corresponding ToxA and Tox3 bands, mapped to the sequence of ToxA and Tox3,  
 441 respectively, are shown in grey. Predicted pro-domain sequences are underlined. Peptides  
 442 were analysed by MaxQuant v1.6.8.0 specifying digestion mode as “Trypsin/P”.

443

444

445

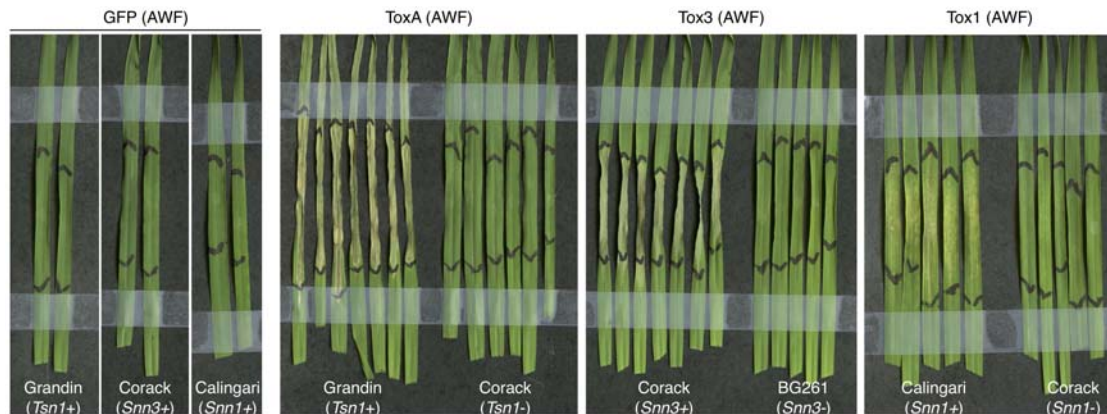

446

447 **Figure 2.** Apoplast washing fluid (AWF) containing the secreted ToxA, Tox3 and Tox1  
 448 trigger necrosis in wheat cultivars carrying the susceptibility genes Grandin (*Tsn1*), Corack  
 449 (*Snn3*) and Calingari (*Snn1*), respectively. Wheat cultivars Corack (*tsn1, snn1*) and BG261  
 450 (*snn3, snn1*) were used for genotype specificity controls, and AWF from *N. benthamiana*  
 451 expressing GFP was used for AWF background control. The leaves were harvested and  
 452 recorded three days after AWF infiltration.

453

454 **Table 1.** Analysis of *P. nodorum* effectors used in this study.

| SCR effector | Accession number | Number of cysteines | Predicted signal peptide by SignalP 5.0 | Reference             |
|--------------|------------------|---------------------|-----------------------------------------|-----------------------|
| ToxA         | AGE15694.1       | 2                   | 1-16                                    | (Friesen et al. 2006) |
| Tox3         | ACR78113.1       | 6                   | 1-20                                    | (Liu et al. 2009)     |
| Tox1         | JN791682.1       | 16                  | 1-17                                    | (Liu et al. 2012)     |

455
